# Determinación del índice de calidad del agua en ríos de Santo Domingo de los Tsáchilas, Ecuador

## *Water quality index determination in rivers of Santo Domingo de los Tsachilas, Ecuador*

García-González, J.<sup>a\*</sup>, Osorio-Ortega, M.A.<sup>b</sup>, Saquicela-Rojas, R.A.<sup>a3</sup>, Cadme, M.L.<sup>b</sup>

<sup>a</sup>Universidad UTE, Vía Chone km 4½, Santo Domingo, Ecuador.

<sup>b</sup>Universidad Técnica Estatal de Quevedo, Av Quito km 1½, Quevedo, Los Ríos, Ecuador.

E-mail: <sup>a1</sup>juditgg74@gmail.com, <sup>a2</sup>marcos.osorio@ute.edu.ec, <sup>a3</sup>rodrigo.saquicela@ute.edu.ec, <sup>b1</sup>lorena.cadme@uteq.edu.ec

\*Autor para correspondencia

Recibido: 01/07/2020

Aceptado: 16/04/2021

Publicado: 30/04/2021

**Citar como:** Santibáñez, N., Mazzorana, B., Iribarren, P., Mao, L., Rojas, I. 2021. Water quality index determination in rivers of Santo Domingo de los Tsachilas, Ecuador. *Ingeniería del agua*, 25(2), 115-126. <https://doi.org/10.4995/ia.2021.13921>

## RESUMEN

En este trabajo se realizó una selección del Índice de Calidad del Agua (ICA) más idóneo que se ajusta a la normativa técnica para los ríos de la provincia de Santo Domingo de los Tsáchilas, Ecuador. Fueron seleccionados 9 ríos del territorio (Pove, Otongo, Mapali, Cucaracha, Chila, Damas, Camal, Bolo y el Estero Kasama) abarcando 26 puntos de muestreos durante los años 2015-2017. El análisis comparativo se realizó entre los Índices de Calidad del Agua: NSF, CCME, ICG, ICAUCA, y de León. El ajuste a la normativa ecuatoriana se realizó mediante pruebas estadísticas bajo los siguientes criterios: la recta con mayor pendiente, menor intervalo de confianza de la pendiente, y menor cantidad de parámetros que evalúa cada ICA. Se obtuvo como principal resultado que el ICA-NSF describe mejor la calidad del agua de los ríos, utilizando menos parámetros.

**Palabras clave** | índice de calidad del agua, ríos, contaminación.

## ABSTRACT

*A selection of the most suitable Water Quality Index was performed in this work, according to the Ecuadorian technical regulations for the rivers of the province of Santo Domingo de los Tsachilas, Ecuador. Nine rivers from the territory were selected (Pove, Otongo, Mapali, Cucaracha, Chila, Damas, Camal, Bolo and the Kasama Stream) covering 26 sampling points during the years 2015-2017. A comparative analysis was carried out among the Water Quality Indices: NSF, CCME, ICG, ICAUCA and León. The adjustment of these to the Ecuadorian regulations was conducted by means of statistical tests according to the following criteria: the straight line with the steepest slope, lower confidence interval of the slope, and the least amount of parameters that each WQI evaluates. As a main result, WQI-NSF was discovered to be most adequate, since it describes rivers' water quality better, using fewer parameters.*

**Key words** | water quality index, rivers, pollution.

## INTRODUCCIÓN

Las aguas continentales han constituido históricamente el eje desde el cual se erigen las sociedades y civilizaciones. En el contexto actual de un mundo globalizado y dinámico, las aguas superficiales han sido afectadas directa e indirectamente por la contaminación antropogénica, dada por el vertimiento de aguas residuales domésticas, industriales y de producción agrícola y ganadera. También otras fuentes de contaminación son: el transporte terrestre, y marítimo de sustancias peligrosas o petróleo, aguas de extracción minera y residuos sólidos dispuestos en rellenos sanitarios.

Desde épocas pasadas el diseño de un método o instrumento para la examinación y comprensión del estado de salud de los cuerpos de agua, así como el grado de aptitud para disímiles usos, como su consumo o el riego en los cultivos, despertó el interés en el hombre. Se tiene conocimiento que desde hace 139 años varios países europeos desarrollaron y aplicaron diferentes sistemas en el afán de clasificar la calidad de las aguas. (Ott, 1978a, 1978b; Behar *et al.*, 1997).

Recientemente, en la valoración y evaluación de la calidad del agua, se han empleado diversas metodologías tales como la modelación, la comparación de las variables con la normatividad vigente y los Índices de Calidad del Agua (ICA) (Valdes *et al.*, 2011).

El ICA es una herramienta simple y multidimensional para la evaluación del recurso hídrico, fundamental en procesos decisorios de políticas públicas, actividades de producción y el seguimiento de sus impactos (CETESB, 2006). En términos simples, es un índice dado por un valor único, un rango, una descripción verbal e incluso un color, resultado del análisis cuali-cuantitativo de las mediciones integradas de un conjunto de diversos parámetros, representativos y específicos, que describen holísticamente las condiciones y características del cuerpo de agua, permitiendo además la comparación entre su estado natural o anterior y el actual (Fernández y Solano, 2008).

Los ICAs permiten mostrar la variación espacial y temporal de la calidad del agua, y una fácil interpretación de los datos. Igualmente posibilitan la identificación de tendencias de la calidad del agua en áreas problemáticas mejorando la comunicación con el público y aumentando su conciencia. Además ayudan en la definición de prioridades con fines de gestión. Sin embargo, presentan limitaciones, puesto que no proporcionan información completa sobre la calidad del agua y no pueden evaluar todos los riesgos presentes. Asimismo, pueden llegar a ser subjetivos y sesgados en su formulación y no son de aplicación universal debido a las diferentes condiciones ambientales que presentan las cuencas de una región a otra. (Sacha y Espinoza, 2001; Patiño *et al.*, 2004; Nasiri *et al.*, 2007)

Se han creado numerosos ICAs en las diferentes regiones del mundo: como el ICA de National Sanitation Foundation NSF (Brown *et al.*, 1970) de Estados Unidos, ICA de León de México (León, 1998), el CCME (Canadian Council of Ministers of the Environment, 2001) en Canadá, el Índice de Calidad General (Beamonte *et al.*, 2012) de España, el Índice Holandés de la Calidad del agua (Calvo y Mora, 2012), entre otras. Por esta razón, es difícil en los estudios de investigación del recurso hídrico y para los organismos e instituciones responsables y evaluadores de la calidad de agua el elegir un ICA adecuado, teniendo en cuenta las condiciones geográficas y circunstancias ambientales de su territorio (Brown *et al.*, 1970; León, 1998).

En Ecuador ha preponderado el uso del NSF, como ejemplos se cita el caso del estudio técnico de la subcuenca del Río Coca (SENAGUA, 2012), el estudio de calidad de agua superficial en la cuenca del Río Mira (Altamirano, 2013) y la evaluación de la calidad en el Río Portoviejo (Quiroz *et al.*, 2017). No obstante, otros ICAs han sido utilizados como el de Dinius (Dinius, 1987) en la valoración de la calidad de agua destinada al consumo humano en Quevedo (Baque-Mite *et al.*, 2016) y el aplicado en el Río Burgay que es un modelo aditivo de calidad del Instituto Mexicano de Tecnología del Agua (Pauta-Calle y Chang Gómez, 2014).

En este sentido se plantea el objetivo de definir el ICA más idóneo que se ajuste a la normativa ambiental vigente: Criterios de calidad de fuentes de agua para consumo humano y doméstico del Libro VI del Texto Unificado de Legislación Secundaria del Ministerio del Ambiente (TULSMA) en Ecuador, aplicado en varios ríos de la provincia de Santo Domingo de los Tsáchilas.

## MATERIAL Y MÉTODOS

Los ríos seleccionados para el estudio pertenecen a la provincia de Santo Domingo de los Tsáchilas, Ecuador. Ellos son el Pove, Otongo, Mapali, Cucaracha, Chila, Damas, Camal, Bolo y el Estero Kasama. Se muestrearon 26 puntos por varios meses durante un periodo que abarcó los años 2015-2017. En todos los ríos se tomaron tres puntos de muestreos exceptuando el Pove con 4 puntos debido a que este pasa por el interior de la ciudad de Santo Domingo y el Chila que se muestreo en un solo punto (Figura 1 y 2). Cada uno de estos puntos fue debidamente geo-referenciado. El muestreo se realizó cumpliendo la metodología estipulada en la Norma Técnica Ecuatoriana INEN 2226 (Calidad del agua. Muestreo. Diseño de los programas de muestreo) y la 2176 (Calidad del agua. Muestreo. Técnicas de muestreo).

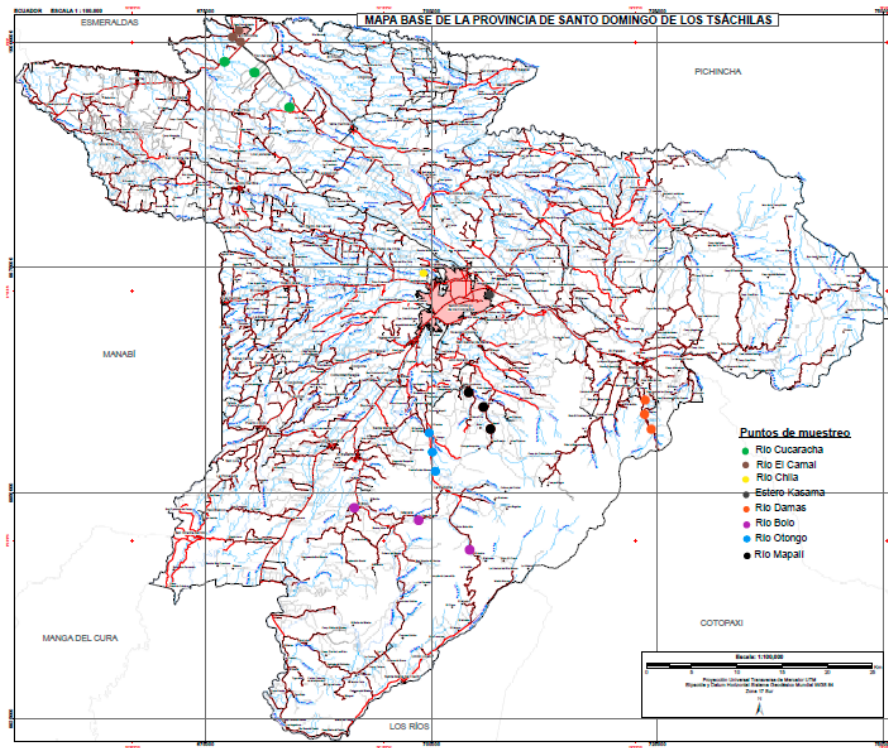

**Figura 1** | Ubicación de los puntos de muestreo en los ríos Otongo, Mapali, Cucaracha, Chila, Damas, Camal, Bolo y Kasama de la provincia de Santo Domingo de los Tsáchilas.

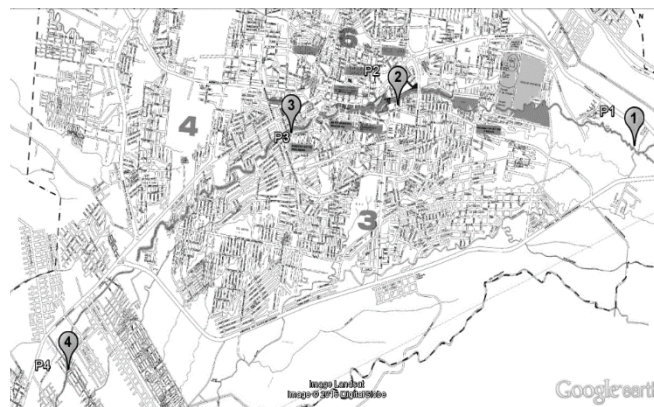

**Figura 2** | Ubicación de los puntos de muestreo en el río Pove en el interior la ciudad de Santo Domingo de los Tsáchilas.

Los parámetros analizados en el laboratorio y la cantidad de muestras por análisis se muestran en la Tabla 1. Los métodos de ensayo se realizaron mediante Standard Methods (SM) (Ed. 22, 2012 y Ed. 21, 2005).

**Tabla 1** | Parámetros, métodos y muestras analizadas.

| Parámetro           | Unidad      | Técnica                            | Método de Ensayo | muestras |
|---------------------|-------------|------------------------------------|------------------|----------|
| Alcalinidad         | mg/L        | Volumetría                         | SM, 2320 B       | 58       |
| Cloruros            | mg/L        | Volumetría                         | SM, 4500 Cl B    | 52       |
| Dureza              | mg/L        | Volumetría                         | SM, 2340 C       | 28       |
| Coliformes fecales  | ufc/100mL   | Número más probable                | SM, 9222 B2a     | 58       |
| Coliformes totales  | ufc/100mL   | Número más probable                | SM, 9222 B2a     | 16       |
| Conductividad       | uS/cm       | Electrometría                      | SM, 2510 B       | 77       |
| DBO <sub>5</sub>    | mg/L        | Volumetría                         | SM, 5210 B       | 27       |
| DQO                 | mg/L        | Reflujo cerrado Espectrofotometría | SM, 5220 C       | 97       |
| Fosfatos            | mg/L        | Espectrofotometría                 | SM, 4500 P E     | 63       |
| Nitratos            | mg/L        | Espectrofotometría                 | SM 4500 NO3 B    | 66       |
| OD                  | mg/L        | Volumetría                         | SM, 4500 O.B.    | 103      |
| pH                  | Unidades pH | Electrometría                      | SM, 4500 pH B    | 110      |
| Sólidos suspendidos | mg/L        | Gravimetría                        | SM, 2540 D       | 36       |
| Sólidos totales     | mg/L        | Gravimetría                        | SM, 2540 B       | 107      |
| Temperatura         | °C          | Termometría                        | SM, 2550 B       | 91       |
| Turbidez            | NTU         | Nefelometría                       | SM, 2130 B       | 107      |
| Cobre               | mg/L        | Espectrofotometría                 | SM, 3111 C B     | 31       |
| Hierro              | mg/L        | Espectrofotometría                 | SM, 3500 Fe B    | 56       |

Con base en la revisión de literatura, y conocidas algunas características de la región en estudio, se seleccionaron los ICA de acuerdo con el cumplimiento de los siguientes criterios: amplio uso a nivel internacional, clasificación considerando el destino del recurso con fines de abastecimiento público y vida acuática, y viabilidad de los parámetros a evaluar. Se seleccionaron los siguientes índices para ser evaluados: NSF de EU (Brown *et al.*, 1970), CCME de Canadá (Canadian Council of Ministers of the Environment, 2001), ICG de España (Beamonte *et al.*, 2012), ICAUCA de Colombia (CVC, 2004), ICA- León de México (León, 1998). En la Tabla 2 se presentan las ecuaciones para el cálculo de cada ICA con sus observaciones.

**Tabla 2** | Ecuaciones para los ICA.

| Índice              | Ecuación                                                 | Observaciones                                                                                                                                                                                                                                                                       |
|---------------------|----------------------------------------------------------|-------------------------------------------------------------------------------------------------------------------------------------------------------------------------------------------------------------------------------------------------------------------------------------|
| NSF<br>ICG          | $ICA = \sum_{i=1}^n W_i * I_i$                           | Promedio aritmético ponderado:<br><i>W<sub>i</sub></i> : peso o porcentaje asignado al iésimo parámetro<br><i>I<sub>i</sub></i> : subíndice de i-ésimo parámetro                                                                                                                    |
| CCME                | $ICA = 100 - \frac{\sqrt{F_1^2 + F_2^2 + F_3^2}}{1.732}$ | El índice incorpora tres elementos:<br>Alcance (F1): porcentaje de parámetros que exceden la norma.<br>Frecuencia (F2): porcentaje de pruebas individuales de cada parámetro que excede la norma.<br>Amplitud (F3): magnitud en la que excede la norma cada parámetro que no cumple |
| ICAUCA<br>ICA- León | $ICA = \prod_{i=1}^n Q_i^{W_i}$                          | Promedio geométrico ponderado:<br><i>W<sub>i</sub></i> : peso o porcentaje asignado al iésimo parámetro<br><i>Q<sub>i</sub></i> : subíndice de i-ésimo parámetro                                                                                                                    |

El cálculo de los ICA se llevó a cabo mediante las siguientes etapas:

Estimación de los subíndices “*I<sub>i</sub>*” o “*Q<sub>i</sub>*” (son equivalentes) que corresponden a la transformación adimensional de cada parámetro que conforma los ICA mediante curvas o ecuaciones matemáticas proporcionada por cada método. Los valores de “*I<sub>i</sub>*” varían entre 0 y 100, cuanto mayor es *I<sub>i</sub>* mejor es la calidad del agua.

Asignación del peso relativo ( $W_i$ ) que define la importancia de cada parámetro dentro del ICA evaluado y se relaciona con el uso a evaluarse; la sumatoria de los pesos " $W_i$ " debe ser igual a 1. En estos índices en general, los parámetros que tienen mayor peso relativo son el oxígeno disuelto, los coliformes y los asociados a presencia de materia orgánica como la DBO. La Tabla 3 presenta los pesos asignados a los parámetros que conforman cada ICA.

**Tabla 3** | Parámetros y pesos relativos  $W_i$  para cada ICA.

| Parámetros                         | Pesos relativos ( $W_i$ ) |       |        |           |
|------------------------------------|---------------------------|-------|--------|-----------|
|                                    | NSF                       | ICG   | ICAUCA | ICA- León |
| Oxígeno Disuelto                   | 0,17                      | 0,143 | 0,21   | 0,103     |
| Coliformes Fecales                 | 0,16                      |       | 0,16   | 0,143     |
| pH                                 | 0,11                      | 0,143 | 0,08   | 0,063     |
| DBO <sub>5</sub>                   | 0,11                      | 0,143 | 0,15   | 0,096     |
| Cambio de T°                       | 0,10                      |       |        | 0,043     |
| Fosfatos                           | 0,10                      | 0,048 | 0,08   | 0,073     |
| Nitratos                           | 0,10                      | 0,048 | 0,08   | 0,053     |
| Turbidez                           | 0,08                      |       | 0,07   |           |
| Sólidos Totales                    | 0,07                      |       | 0,07   |           |
| Demanda Química de Oxígeno         |                           | 0,048 |        | 0,053     |
| Sólidos Suspendidos                |                           | 0,143 | 0,05   | 0,033     |
| Coliformes Totales                 |                           | 0,143 |        | 0,083     |
| Amonio                             |                           |       |        | 0,043     |
| Fenoles                            |                           |       |        | 0,033     |
| Alcalinidad como CaCO <sub>3</sub> |                           |       |        | 0,055     |
| Dureza como CaCO <sub>3</sub>      |                           |       |        | 0,058     |
| Cloruros                           |                           |       |        | 0,068     |
| Color                              |                           |       | 0,05   |           |
| Conductividad                      |                           | 0,143 |        |           |

Finalmente, con los valores de " $I_i$ " y " $W_i$ " obtenidos en cada caso, se realizó el cálculo de los ICA seleccionados. En el caso del ICA CCME para el cálculo de F1, F2 y F3 se tomó como normativa Criterios de calidad de fuentes de agua para consumo humano y doméstico del Libro VI del Registro Oficial (2015). La valoración de la calidad del agua por cada índice se determinó según la escala de clasificación aportada por cada autor (Tabla 4).

**Tabla 4** | Clasificación de la calidad del agua según los valores del ICA.

| NSF               | CCME                | ICG               | ICAUCA            | ICA- León                                                         |
|-------------------|---------------------|-------------------|-------------------|-------------------------------------------------------------------|
| Excelente: 91-100 | Excelente: 96-100   | Excelente: 100-90 | Óptima: 80-100    | Excelente: 90-100                                                 |
| Buena: 71-90      | Bueno: 81-95        | Buena: 90-80      | Bueno: 50-80      | Aceptable: 80-90                                                  |
| Media: 51-70      | Insuficiente: 66-80 | Intermedia: 80-70 | Aceptable: 35-50  | Levemente contaminada: 70-80                                      |
| Mala: 26-50       | Marginal: 46-65     | Admisibles: 70-60 | Inadecuada: 20-35 | Contaminada: 50-70                                                |
| Muy Mala: 0-25    | Pobre: 0-45         | Inadmisible: 60-0 | Pésima: 0-20      | Fuertemente contaminada: 40-50<br>Excesivamente contaminada: 0-40 |

Los parámetros evaluados se compararon con los Criterios de calidad de fuentes de agua para consumo humano y doméstico del Libro VI del TULSMA. Para comprobar el cumplimiento de la normativa se realizaron las pruebas estadísticas de normalidad shapiro wils y t-student contra el valor normado y se obtuvo la probabilidad ( $\alpha=0.05$ ) para cada parámetro, en cada río. Cuando el valor normado es un máximo si  $p$ -valor es  $\geq \alpha$ : la media no es menor a la indicada por el parámetro, no se rechaza la  $H_0$ . Cuando el valor normado es un mínimo si  $p$ -valor es  $\geq \alpha$ : la media no es mayor a la indicada por el parámetro, no se rechaza la  $H_0$ . Ambas pruebas estadísticas se obtuvieron aplicando el software InfoStat +R (2018).

Se pretendió interpretar cuál de estos ICA se ajusta más a la normativa ecuatoriana. La selección del ICA más idóneo estribó en los siguientes criterios: la recta con mayor pendiente que nos indica mayores valores del ICA con igual % de incumplimiento; menor intervalo de confianza de la pendiente, y menor cantidad de parámetros que evalúa cada ICA.

Para ello se realizaron diagramas de dispersión entre el valor de cada ICA y el porcentaje de los parámetros incumplidos de los nueve ríos de estudio. Además se obtuvo rectas de regresión, las pendientes de las rectas y el coeficiente  $R^2$ . Se efectuó una prueba estadística individual para cada modelo lineal (análisis de la varianza para efectos fijos en modelos lineales y mixtos) obteniéndose el p-valor de cada constante de la recta y el intervalo de confianza con el software InfoStat +R (2018). Además, fue ejecutada una prueba de hipótesis entre pendientes con regresión lineal para determinar si existen diferencias significativas entre las pendientes ( $H_0$ : pendientes iguales), según Jerrold H. Zar (2014) en *Biostatistical Analysis*, Capítulo 18.4 página 372, se calculó el estadístico  $F = [(SSc - SSsp) / (k - 1)] / (SSsp / DFp)$  y el p-valor.

## RESULTADOS

### Aplicación de los ICAs

En la Figura 3 se muestra el comportamiento de los ICAs evaluados. En la aplicación del ICA-NSF los ríos Damas, Otongo y Mapali están en categoría de buena, el Cucaracha, Camal, Kasama y el Bolo en media y el Chila y el Pove en mala. El ICA CCME nos reporta que el Damas, Otongo y Mapali están en excelentes condiciones; el Cucaracha, Camal, Chila y Bolo en categoría insuficiente; el Estero Kasama en marginal y el Pove en un estado pobre. En contraste, el ICA de León determinó que el Bolo, Damas, Otongo y Mapali están levemente contaminados. El Cucaracha, Camal, Chila y el Estero Kasama, contaminados y el

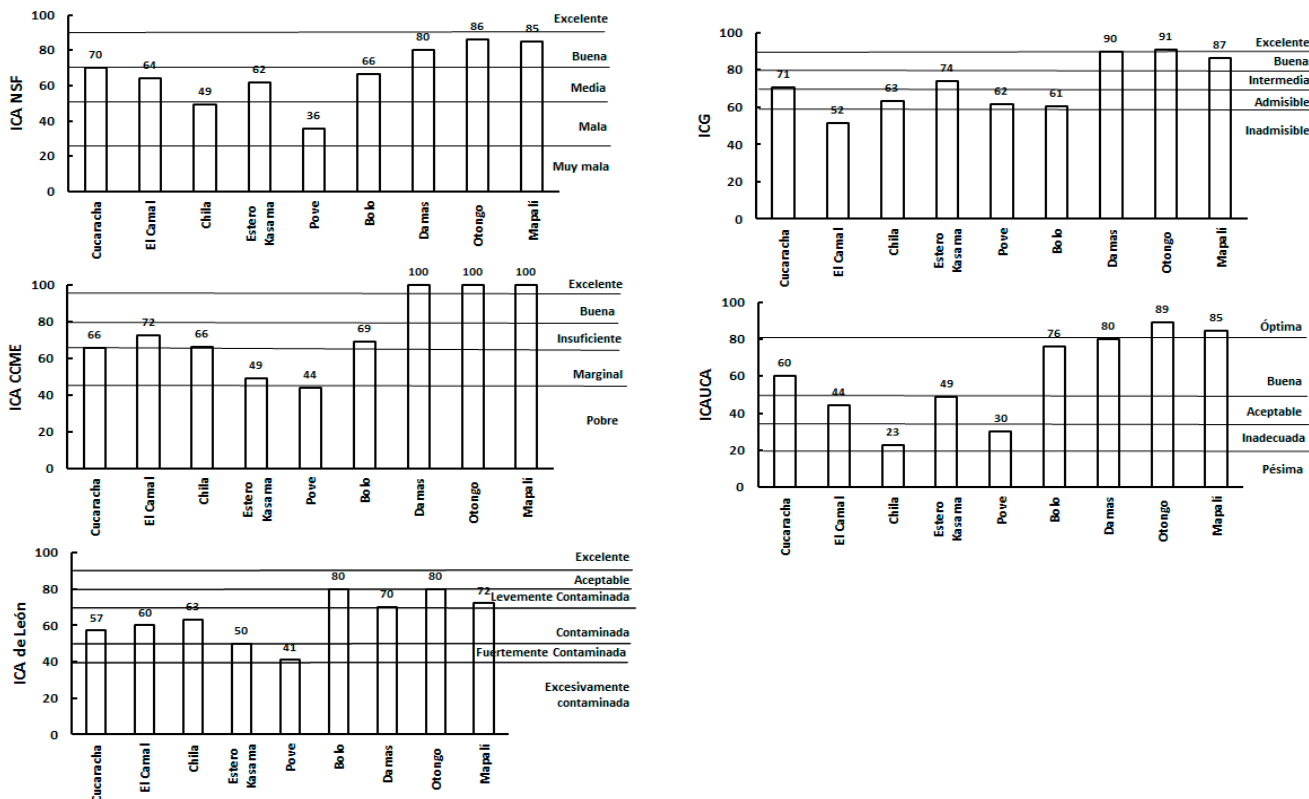

Figura 3 | Resultados de los Índices de Calidad del Agua en varios ríos de la provincia de Santo Domingo de los Tsáchilas.

Pove fuertemente contaminado. El ICG resultó con Damas y Otongo excelente, Mapali en buena, Cucaracha y Estero Kasama intermedia, Chila, Bolo y Pove admisible, y el Camal en inadmisibles. El ICAUCA categoriza el Damas, Otongo y Mapali en óptima, Cucaracha y Bolo buena, el Camal y Estero Kasama aceptable, el Pove y el Chila en inadecuada.

En general, todos los ICAs arrojaron calidades similares para los ríos Damas, Otongo y Mapali definiéndolos como cuerpos en buenas condiciones para el consumo humano; y en el otro extremo al Pove, cuya calidad determinaron como pésima.

## Comparación con la normativa

No todos los parámetros evaluados en los ríos de estudio figuran en la normativa por lo que solo se muestran los que si aparecen en la normativa (Tabla 5). Los resultados estadísticos mostraron que el río Pove incumple en DQO y coliformes fecales, el Cucaracha en DQO y DBO<sub>5</sub>, el Camal, Chila y el Bolo incumplen en DQO, el Kasama en DBO<sub>5</sub> y el Damas, Otongo y Mapali cumplen en todos los parámetros.

**Tabla 5 |** Prueba de hipótesis de los parámetros evaluados con los límites máximos y mínimos de la normativa.

| Variable           | Normativa      | Cucaracha |                |                | Kasama  |                |                | El Camal |                |                | Chila Grande |                |                |
|--------------------|----------------|-----------|----------------|----------------|---------|----------------|----------------|----------|----------------|----------------|--------------|----------------|----------------|
|                    |                | Media     | p <sup>1</sup> | p <sup>2</sup> | Media   | p <sup>1</sup> | p <sup>2</sup> | Media    | p <sup>1</sup> | p <sup>2</sup> | Media        | p <sup>1</sup> | p <sup>2</sup> |
| DQO                | max 4 mg/L     | 22.46     | 0.4552         | >0.001*        | 16.85   | 0.6667         | 0.0669         | 80.76    | 0.0700         | 0.0018*        | 32.8         | 0.1829         | 0.0001*        |
| DBO                | max 2 mg/L     | 6.72      | 0.169          | >0.001*        | 6.39    | 0.7673         | >0.0146*       |          |                |                |              |                |                |
| Nitratos           | max 50 mg/L    | 1.72      | 0.2034         | >0.9999        | 2.69    | 0.2660         | >0.9999        | 0.7      | 0.0797         | >0.9999        |              |                |                |
| pH                 | 6 a 9          | 6.18      | 0.1822         | >0.9999        | 7.06    | 0.2397         | 0.9433         | 6.67     | 0.6710         | 0.999          | 7.1          | 0.268          | 0.9999         |
| Coliformes Fecales | 1000 NMP/100mL | 379       | 0.061          | 0.9999         | 1334.07 | >0.9999        | 0.4128         |          |                |                |              |                |                |
| Cu                 | max 200 mg/L   |           |                |                | 0.09    | >0.9999        | 0.9991         |          |                |                | 0.0043       | 0.0786         | 0.8425         |
| Turbiedad          | max 100 UNT    | 18.15     | 0.2587         | 0.9999         |         |                |                | 11.83    | 0.0929         | 0.999          | 104          | 0.059          | 0.436          |
| Aceites y grasas   | max 0.3 mg/L   |           |                |                |         |                |                |          |                |                |              |                |                |
| Fe                 | max 1 mg/L     |           |                |                | 1.09    | 0.8586         | 0.3967         |          |                |                | 0.06         | 0.058          | 0.9999         |

  

| Variable           | Norma          | Mapali |                |                | Otongo |                |                | Damas |                |                | Pove  |                |                | Bolo  |                |                |
|--------------------|----------------|--------|----------------|----------------|--------|----------------|----------------|-------|----------------|----------------|-------|----------------|----------------|-------|----------------|----------------|
|                    |                | Media  | p <sup>1</sup> | p <sup>2</sup> | Media  | p <sup>1</sup> | p <sup>2</sup> | Media | p <sup>1</sup> | p <sup>2</sup> | Media | p <sup>1</sup> | p <sup>2</sup> | Media | p <sup>1</sup> | p <sup>2</sup> |
| DQO                | max 4 mg/L     |        |                |                |        |                |                |       |                |                | 9.33  | 0.4859         | 0.011*         | 10.6  | 0.0877         | 0.0002*        |
| DBO                | max 2 mg/L     |        |                |                |        |                |                |       |                |                |       |                |                |       |                |                |
| Nitratos           | max 50 mg/L    | 0.08   | >0,999         | >0,999         | 0.13   | 0.4628         | 0.9999         | 0.04  | 0.6394         | >0.999         |       |                |                | 0.17  | 0.967          | 0.9999         |
| pH                 | 6 a 9          | 6.67   | 0.4409         | 0.9999         | 7.36   | 0.7232         | 0.9996         | 7.9   | 0.5351         | 0.9999         | 6.67  | 0.0591         | 0.9999         | 6.53  | 0.1913         | 0.99999        |
| Coliformes Fecales | 1000 NMP/100mL |        |                |                |        |                |                |       |                |                | 20093 | 0.0841         | 0.013*         | 1362  | 0.0703         | 0.0947         |
| Cu                 | max 200 mg/L   |        |                |                |        |                |                |       |                |                |       |                |                |       |                |                |
| Turbiedad          | max 100 UNT    | 7.47   | 0.8327         | 0.9999         | 6.33   | 0.0768         | 0.9999         | 38.1  | 0.9548         | 0.9994         | 130.3 | 0.2282         | 0.3327         | 3.85  | 0.6371         | 0.9999         |
| Aceites y grasas   | max 0,3 mg/L   |        |                |                |        |                |                |       |                |                |       |                |                |       |                |                |
| Fe                 | max 1 mg/L     | 0.1    | 0.8439         | 0.997          | 0.05   | 0.6394         | 0.9994         | 0.06  | >0.999         | 0.9999         | 0.16  | 0.1329         | 0.9999         |       |                |                |

<sup>1</sup> Probabilidad obtenida en la prueba de normalidad shapiro wils.

<sup>2</sup> Probabilidad obtenida en la prueba t-students.

\*Valores de  $p < 0.05$  No cumple con la normativa.

## Selección del ICA que más se ajusta a la normativa ecuatoriana

Graficando rectas de regresión entre el valor de los ICAs y el % de incumplimiento con la normativa ecuatoriana de los nueve ríos nos muestra un alto nivel de ajuste lineal en todos los casos (Figura 4). El ICA con mayor pendiente (valor absoluto) fue el ICAUCA [1.43], seguido del NSF [1.37] y el menor fue el de León [0.49]. Las rectas con mayores coeficientes de determinación pertenecieron al NSF (0.74), el ICG (0.71), y el ICAUCA (0.61), respectivamente.

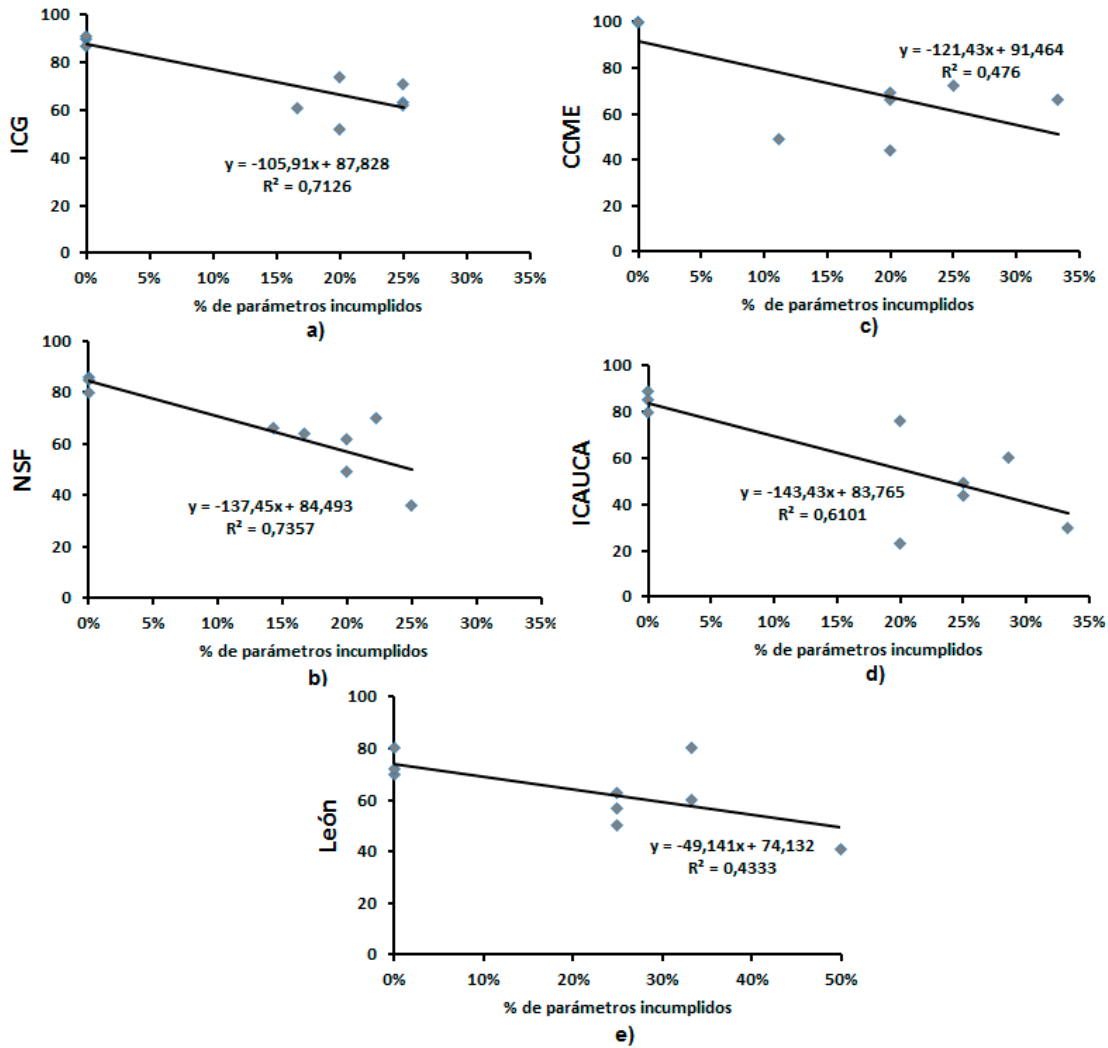

Nota: el valor b de la recta  $y = a + bx$ , esta expresado en %.

**Figura 4 |** Diagramas de dispersión y rectas de regresión entre los ICAs y el % de parámetros incumplidos en la normativa ecuatoriana.

La significación de las constantes a y b de la recta ( $y = a + bx$ ) se presentan en la Tabla 6 mostrando que en todos los casos excepto en la pendiente de León esos valores son significativos ( $p=0.0539$ ), es decir, cumplen con la ecuación de una recta. El menor intervalo de confianza perteneció al ICG, seguidos del NSF y el ICAUCA, mostrando que los datos se encuentran menos dispersos.

**Tabla 6 |** Resultados estadísticos de la regresión lineal entre los ICAs y el % de parámetros incumplidos.

| Índice de Calidad | a     | p-valor | t-valor | bx    | p-valor | t-valor | Intervalo de confianza bx |       |
|-------------------|-------|---------|---------|-------|---------|---------|---------------------------|-------|
|                   |       |         |         |       |         |         | Mín                       | Máy   |
| CCME              | 91.46 | <0.0001 | 10.3    | -1.21 | 0.0397  | -2.52   | -2.35                     | -0.08 |
| ICAUCA            | 83.76 | <0.0001 | 09.19   | -1.43 | 0.0129  | -3.31   | -2.46                     | -0.41 |
| ICG               | 87.83 | <0.0001 | 19.07   | -1.06 | 0.0042  | -4.17   | -1.66                     | -0.46 |
| León              | 74.13 | <0.0001 | 12.89   | -0.49 | 0.0539  | -2.31   | -0.99                     | 0.01  |
| NSF               | 84.49 | <0.0001 | 16.61   | -1.37 | 0.0310  | -4.41   | -2.11                     | -0.64 |

Nota: El valor b está expresado en fracción.



Los cálculos de prueba de hipótesis entre pendientes con regresión lineal se muestran en la Tabla 7. Los cálculos subsiguientes dieron como resultado el estadístico  $F = 0.381549447$  y  $P$  valor = 0.820282276. Este  $P$  valor es no significativo lo que indica que no existen diferencias significativas entre las pendientes.

**Tabla 7** | Resultados de la prueba de hipótesis comparación de más de dos pendientes con regresión lineal.

| Regresiones | $\sum xy$ | $\sum x^2$  | $\sum y^2$ | n | b    | SS residuales | DF residual |
|-------------|-----------|-------------|------------|---|------|---------------|-------------|
| CCME        | 8124,17   | 3059,3210   | 52994      | 9 | 2,66 | 31419,88660   | 7           |
| ICAUCA      | 7019,10   | 3977,1338   | 36688      | 9 | 1,76 | 24300,24357   | 7           |
| ICG         | 8436,87   | 2952,8889   | 48705      | 9 | 2,86 | 24599,52980   | 7           |
| León        | 10966,200 | 6596,7778   | 37883      | 9 | 1,66 | 19653,26026   | 7           |
| NSF         | 6685,42   | 2400,8214   | 41914      | 9 | 2,78 | 23297,52125   | 7           |
| Combinado   |           |             |            |   |      | 123270,441500 | 35          |
| Común       | 41231,760 | 18986,94290 | 218184     |   |      | 128645,729300 | 39          |

Nota:  $F = 0.381549447$  y  $P$ -valor = 0.820282276.

## DISCUSIÓN

Realizando una comparación de los resultados de la aplicación de los ICA (Figura 3), el CCME reporta al Estero Kasama como marginal, lo cual difiere con lo obtenido según el ICA-NSF (calidad media). Esto pudiera responder a que la metodología del CCME incluye todos los parámetros evaluados, considerando los metales pesados (Fe y Cu), excluidos en el NSF. En contraste, el resultado arrojado por el ICA de León diverge de los dos ICAs anteriores en los ríos Damas, Otongo y Mapali descritos por el mismo como levemente contaminados. Una de las posibles causas es que a diferencia de los anteriores índices, toma en cuenta la Alcalinidad ( $\text{CaCO}_3$ ) y los Sólidos Suspendidos Totales. Igualmente, el ICG se aleja de los resultados presentados previamente, para los ríos Bolo y Camal (admisible e inadmisible, respectivamente); probablemente porque incluye en su valoración parámetros no considerados en los anteriores ICAs, como la DQO y los Coliformes Totales. Por último, la aplicación del ICAUCA muestra gráficamente una distribución similar a la obtenida por el NSF. Este resultado coincide con el trabajo de Torres *et al.* (2010) donde realizaron una aplicación de varios ICAs orientados al uso de fuentes para consumo humano en el río Cauca y argumentaron que el ICAUCA presentó una tendencia similar al NSF.

La disparidad en los resultados arrojados por cada ICA estriba en su propia naturaleza, puesto que no consideran en la evaluación iguales factores, ni tampoco les asignan la misma importancia a aquellos que coinciden. En general, se observa que la sensibilidad de los ICAs en los extremos de las clasificaciones es alta, pudiendo catalogar sin inconvenientes a los ríos muy limpios o muy sucios. En el centro de las categorizaciones es donde los resultados varían, pudiendo ubicar en diferentes rangos de calidad a un mismo cuerpo de agua. Esta disparidad se muestra también en el trabajo de González *et al.* (2013) donde se aplica el ICA de Dinius y el NSF en la quebrada La ayurá en la estación 1 se obtiene calidades de Regular y Buena respectivamente. Similares resultados a los anteriores también se muestran en el estudio de Cahoy y López (2017) donde determinaron dos ICAs en el humedal Torca-Guaymaral a través de las metodologías UWQI y CWQI dando como resultados que la mayoría de puntos valorizados por el ICA-UWQI tuvieron una valoración de regular, y para el ICA-CWQI, de pobre. Igualmente los valores obtenidos por los ICAs estudiados presentan un comportamiento similar al registrado en estudios previos como el realizado por Torres *et al.* (2010) en el cual se aplican el NSF, ICAUCA, Dinius, y el UWQI mostrando diferentes calidades para el mismo punto de muestreo.

Aún así, se hace necesario la selección de un ICA que converja con los límites y estándares de la normativa de cada país, en este caso de Ecuador, sin detrimento de las demás metodologías e índices de calidad que puedan ser utilizados. En este sentido no se tiene ningún trabajo previo que compare los ICA desde el punto de vista estadístico análoga al presente estudio, sino que hace la comparación cualitativa o los modifican a sus condiciones ambientales como es el caso del ICAUCA y el de León. Pérez *et al.* (2018) realizaron una comparación de los ICAs tanto de los valores numéricos como de las clasificaciones. Para ello determinaron la coherencia entre pajas de índices a los cuales les calculó el coeficiente de Spearman y la raíz del error cuadrático medio, obteniendo mayores coincidencias, mejor correlación y menores desviaciones para el valor numérico en parejas de índices

diferentes a las que mostraron coincidencias por clase; hecho que evidencia según su criterio la carencia de relación entre los valores de los índices y su clasificación.

Basado en nuestros resultados, las rectas con mayores pendientes el ICAUCA |1.43|, y el NSF |1.37| significa que obtendremos mayores valores del ICA para el mismo % de incumplimiento de la normativa. Los datos pertenecientes a las rectas con mayores valores de  $R^2$  fueron NSF (0.74), ICG (0.71) e ICAUCA (0.61) representados en la Figura 4, indican un mayor ajuste a la ecuación y una mejor predicción del valor de la variable dependiente (ICA). Los resultados estadísticos alcanzados en la Tabla 6, significan que pudiera usarse cualquier ICA para evaluar la calidad del agua en los ríos debido a que no existen diferencias significativas entre las pendientes de las rectas. No obstante, se evidencia que el ICA de León fue el menos apropiado según los criterios adoptados en la metodología. Por otra parte los más apropiados según los criterios de selección fueron el ICA-NSF y el ICAUCA. Sin embargo, originalmente el NSF toma como referencia 9 parámetros para el análisis mientras que el ICAUCA 10, por lo que se considera a NSF el más indicado. A pesar que no es de uso normativo la Secretaría Nacional del Agua utiliza el NSF para evaluar la calidad del agua en diferentes regiones de Ecuador (SENAGUA, 2012). Es importante agregar que determinar el uso potable mediante un ICA es de cuidado pues se puede encontrar Buena Calidad incumpliendo los requerimientos de uno o dos parámetros de la norma que lo declararía no apta para el consumo (Pérez *et al.*, 2018; Torres *et al.*, 2010). También pudiera valorarse incorporar algunos indicadores o parámetros como pueden ser los metales específicamente el Fe que aparecen en la normativa y no se aplica en ninguno de los ICAs exceptuando el CCME, debido a que es típico en la formación geológica de esta región encontrándose en altas concentraciones en aguas subterráneas y de pozo.

---

## CONCLUSIONES

Todos los ICAs arrojaron calidades similares para los ríos Damas, Otongo y Mapali definiéndolos como cuerpos en condiciones Buena para el consumo humano; y en el otro extremo al Pove, cuya calidad determinaron como Pobre. En el centro de las categorizaciones es donde los resultados varían, pudiendo ubicar en diferentes rangos de calidad a un mismo cuerpo de agua.

El Damas, Otongo y Mapali cumplieron en todos los parámetros con la normativa ecuatoriana, mientras que el Pove incumple en DQO y coliformes fecales, el Cucaracha en DQO y  $DBO_5$ , el Camal, Chila y el Bolo incumplen en DQO, el Kasama en  $DBO_5$ .

Según los criterios de selección el ICA-NSF es el más adecuado describiendo mejor la calidad del agua, con menos parámetros, por tanto se recomienda su uso para el territorio de Santo Domingo de los Tsáchilas. Sin embargo, como las pendientes resultaron ser iguales estadísticas, se recomienda realizar estudios con mayor cantidad de datos. El ICA-NSF es de utilidad para planificar y optimizar el uso de estas fuentes, pero deben usarse con precaución para la toma de decisiones como el uso de agua para el consumo humano.

---

## AGRADECIMIENTOS

Se agradece a los estudiantes de pregrado de la carrera de Ingeniería Ambiental de los años evaluados así como al laboratorio de química de la Universidad Tecnológica Equinoccial por el aporte de los datos y financiamiento para la realización de este estudio.

---

## REFERENCIAS

- Altamirano Mateus, M.G. 2013. *Estudio hidroquímico y de calidad del agua superficial en la cuenca del río Mira*. Tesis de Grado. Universidad Central de Ecuador. Quito. Consultado en <http://www.dspace.uce.edu.ec/handle/25000/1711>
- Baque-Mite, R., Simba-Ochoa, L., González-Ozorío, B., Suatunce, P., Díaz-Ocampo, E., & Cadme-Arevalo, L. 2016. Calidad del agua destinada al consumo humano en un cantón de Ecuador. *Revista Ciencia UNEMI*, 9(20), 109-117. <https://doi.org/10.29076/issn.2528-7737vol9iss20.2016pp109-117p>

- Beamonte, E., Casino, A., Veres, E.J. 2012. Análisis de la calidad general del agua superficial en la cuenca hidrográfica del Júcar: periodo 2000-2009. *Revista Electrónica de Medio Ambiente*, 12, 18-32.
- Behar, R., Zuñiga, M., Rojas, O. 1997. Análisis y Valoración del Índice de Calidad de Agua (ICA) de la NSF: Casos Ríos Cali y Meléndez. *Ingeniería y Competitividad*, 1, 17-27. <https://doi.org/10.25100/iyc.v1i1.2361>
- Brown, R.M., McLelland, N.J., Deininger, RA., Tozer, R.G. 1970. *A Water Quality Index Do We Dare? Water & Sewage Works* 117(10), 339-343
- Caho, C., López, E. 2017. Determinación del Índice de Calidad de Agua para el sector occidental del humedal Torca-Guaymaral empleando las metodologías UWQI y CWQI. *Producción + Limpia*, 12(2), 35-49. <https://doi.org/10.22507/pml.v12n2a3>
- Calvo, G., Mora, J. 2012. Análisis de la calidad de varios cuerpos de agua superficiales en el GAM y la Península de Osa utilizando el Índice Holandés. *Tecnología en Marcha*, 25(5), 37-44. <https://doi.org/10.18845/tm.v25i5.471>
- Canadian Council of Ministers of the Environment. 2001. *Canadian environmental quality guidelines*. Canadian water quality guidelines for the protection of aquatic life: CCME. Winnipeg, Manitoba, Canada.
- CETESB. 2006. *Relatório de qualidade das águas interiores no estado de São Paulo, Anexo V*, Companhia de Tecnologia de Saneamento Ambiental, São Paulo.
- CVC, Universidad del Valle. 2004. *Estudio de la calidad del agua del río Cauca y sus principales tributarios mediante la aplicación de Índices de Calidad y Contaminación*. Proyecto Modelación del Río Cauca (PMC), Fase II, Cali, Valle., Vol. X., Colombia.
- Dinius, S. 1987. Design of an Index Of Water Quality. *Water Res. Bull*, 23(5), 833-843. <https://doi.org/10.1111/j.1752-1688.1987.tb02959.x>
- Fernández, N., Solano, F. 2005. *Índices de Calidad y Contaminación del Agua*. Universidad de Pamplona. Pamplona:
- González, V., Caicedo, O., Aguirre, N. 2013. Aplicación de los índices de calidad de agua NSF, Dinius y BMWP en La Quebrada La Ayurá, Antioquia, Colombia. *Revista Gestión y Ambiente*, 16(1), 97-108. Medellín ISSN 0124.177X.
- León, L. 1998. *Índices de Calidad del Agua (ICA), Formas de estimarlos y Aplicación en la Cuenca Lerma-Chapala*. Instituto Mexicano de Tecnología del Agua. Morelos, Mexico. Obtenido de <https://www.dspace.espol.edu.ec/bitstream/123456789/6147/1/ICA%20Forma%20de%20estimarlos.pdf>
- Nasiri, F., Maqsood, I., Huang G., Fuller, N. 2007. Water Quality Index: A Fuzzy River-Pollution Decision Support Expert System. *Journal of Water Resources Planning and Management*, 133, 95-105. [https://doi.org/10.1061/\(ASCE\)0733-9496\(2007\)133:2\(95\)](https://doi.org/10.1061/(ASCE)0733-9496(2007)133:2(95))
- NTE INEN 2176:98 Agua. *Calidad del Agua. Muestreo. Técnicas de muestreo*. Primera edición, Quito, Ecuador. Consultado en: <https://law.resource.org/pub/ec/ibr/ec.nte.2176.1998.pdf>
- NTE INEN 2226:98 Agua. *Calidad del Agua. Muestreo. Diseño de los programas de muestreo*. Primera edición, Quito, Ecuador. Consultado en: <https://law.resource.org/pub/ec/ibr/ec.nte.2226.1998.pdf>
- Ott, W. 1978a. *Water quality index: a survey of indexes used in the United States*, Michigan, Estados Unidos: Environmental Monitoring Series.
- Ott, W. R. 1978b. *Environmental quality indices: Theory and practice*, Ann Arbor: Ann Arbor Science.
- Patiño, P., Holguín, J., Barba-Ho, L., Cruz, C., Ramírez, C., Duque, A., Baena, L. 2004. Metodología para la adaptación de un Índice de Calidad del Agua a las condiciones medioambientales del Río Cauca en el tramo Sarvajina-Virginia. *Seminario Internacional: Visión integral en el mejoramiento de la calidad del agua*. Universidad del Valle, Instituto Cinara.
- Pauta-Calle, G., Chang-Gómez, J. 2014. Índices de calidad del agua de fuentes superficiales y aspectos toxicológicos, evaluación del Río Burgay. *MASKANA,I+D+ingeniería*, 165-176.
- Pérez, J., Nardini, A., y Galindo, A. 2018. Análisis Comparativo de Índices de Calidad del Agua Aplicados al Río Ranchería, La Guajira-Colombia. *Información Tecnológica*, 29(3), 47-58. <https://doi.org/10.4067/S0718-07642018000300047>

- Quiroz, L., Izquierdo, E., Menéndez, C. 2017. Aplicación del índice de calidad de agua en el río Portoviejo, Ecuador. *Ingeniería Hidráulica y Ambiental*, 38, 41-51.
- Registro Oficial. 2015. Edición Especial No. 387. pp. 7-13. República del Ecuador. Obtenido de [https://www.gob.ec/sites/default/files/regulations/2018-09/Documento\\_Registro-Oficial-No-387-04-noviembre-2015\\_0.pdf](https://www.gob.ec/sites/default/files/regulations/2018-09/Documento_Registro-Oficial-No-387-04-noviembre-2015_0.pdf)
- Sacha, A., Espinoza, C. 2001. Determinación de Contenido Natural e Índices de Calidad: ¿Presente y Futuro de Calidad de Aguas? *XIV Congreso Chileno de Ingeniería Sanitaria y Ambiental AIDIS*, Chile.
- SENAGUA. 2012. Estudio Técnico: DNCA-DHN-12-01; *Análisis de la calidad del agua de la subcuenca del Río Coca*. Secretaría Nacional de Agua.
- Standard Methods for Examination of Water and Wastewater. 2005. 21st Edition. APHA AWWA WEF.
- Standard Methods for Examination of water and wastewater. 2012. 22th Edition, corresponde Standard Methods ONLINE.
- Torres, P., Cruz, C.H., Patiño, P., Escobar, J.C., Pérez, A. 2010. Aplicación de índices de calidad de agua - ICA orientados al uso de la fuente para consumo humano. *Ingeniería e Investigación*, 30(3), 86-95.
- Valdes, J., Samboni, N.E., Carvajal, Y. 2011. Desarrollo de un indicador de la calidad del agua usando estadística aplicada, caso de estudio: subcuenca Zanjón Oscuro. *Revista Tecnológicas*, 26, 165-180. <https://doi.org/10.22430/22565337.60>
- Zar, J. 2014. *Biostatistical Analysis*. FithEdition. Pearson Education Limited. ISBN 10:1-292-02404-6. United States of America. pp. 372-375.
